# Supplementary material for: Implementation of serological and molecular tools to inform COVID-19 patient management: protocol for the GENCOV prospective cohort study
Source: HighWire-hosted journal article supplement (doi:10.1136/bmjopen-2021-052842), 2021-09-01
Supplement: bmjopen-2021-052842supp001_data_supplement.pdf [file bmjopen-2021-052842supp001_data_supplement.pdf]

Dear participant,

Thank you for participating in the GENCOV study: Implementation of serological and molecular tools to inform COVID-19 patient management being conducted by a research team at Mount Sinai Hospital in Toronto. Below is a summary of your [#] month COVID-19 (SARS-CoV-2) antibody results:

Result: **POSITIVE (COVID-19 antibodies identified)**

Total antibody level: **Please refer to attached report**

A positive result means that we identified COVID-19 antibodies in your blood and indicates you had a recent or past exposure to COVID-19. This does not mean that you are immune to a COVID-19 infection in the future. We do not know how long COVID-19 antibodies remain present in the body after a COVID-19 infection at this time. Please continue to follow government health and safety precautions to prevent infection and/or transmission to others.

If you have any questions about your COVID-19 antibody/serology results, please contact the GENCOV study team at (416) 586-4800 ext. 5738 or email [GEN.COV@sinaihealth.ca](mailto:GEN.COV@sinaihealth.ca).

Thank you,

The GENCOV Study Team

**Co-investigators:** Drs. Jordan Lerner-Ellis, PhD, FACMG and Jennifer Taher, PhD, FCACB

**Tel:** 416-586-4800 x 5738

**Fax:** 416-586-8882, Attn: Dr. Jordan Lerner-Ellis

[GEN.COV@sinaihealth.ca](mailto:GEN.COV@sinaihealth.ca)

Mount Sinai Hospital

Department of Pathology and Laboratory Medicine

700 University Avenue, Toronto, ON M5G 1X5

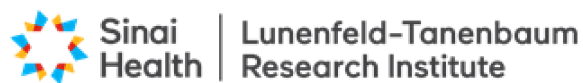

*A patient care, teaching and research centre affiliated with University of Toronto.*

Dear participant,

Thank you for participating in the GENCOV study: Implementation of serological and molecular tools to inform COVID-19 patient management being conducted by a research team at Mount Sinai Hospital in Toronto. Below is a summary of your [#] month COVID-19 (SARS-CoV-2) antibody results:

Result: **NEGATIVE (COVID-19 antibodies NOT identified)**

Total antibody level: **Please refer to attached report**

A negative result means that we did not identify COVID-19 antibodies in your blood. A negative COVID-19 antibody result does not mean that you haven't had a COVID-19 infection. It also does not mean that you are at a higher risk of getting a COVID-19 infection in the future. You may have been tested too early or too late after your COVID-19 infection, and your antibodies did not show up in sufficient levels on the test.

If you have any questions about your COVID-19 antibody/serology results, please contact the GENCOV study team at (416) 586-4800 ext. 5738 or email [GEN.COV@sinaihealth.ca](mailto:GEN.COV@sinaihealth.ca).

Thank you,

The GENCOV Study Team

**Co-investigators:** Drs. Jordan Lerner-Ellis, PhD, FACMG and Jennifer Taher, PhD, FCACB

**Tel:** 416-586-4800 x 5738

**Fax:** 416-586-8882, Attn: Dr. Jordan Lerner-Ellis

[GEN.COV@sinaihealth.ca](mailto:GEN.COV@sinaihealth.ca)

Mount Sinai Hospital

Department of Pathology and Laboratory Medicine

700 University Avenue, Toronto, ON M5G 1X5



*A patient care, teaching and research centre affiliated with University of Toronto.*

Dear participant,

Thank you for participating in the GENCOV study: Implementation of serological and molecular tools to inform COVID-19 patient management being conducted by a research team at Mount Sinai Hospital in Toronto. Below is a summary of your [#] month COVID-19 (SARS-CoV-2) antibody results:

Result: **INCONCLUSIVE**

Your blood was assessed for the presence of COVID-19 antibodies by two different tests. Your result is inconclusive because one test was positive and one test was negative for COVID-19 antibodies. With a previously known COVID-19 diagnosis, a positive test result for COVID-19 antibodies requires both tests to be positive. Your result may be inconclusive for the following reasons:

1. Your antibody levels were “borderline,” meaning they were just below or above the cut-off value of the test.
2. A false positive OR a false negative result may have occurred on one of the testing platforms.
3. Each test measures COVID-19 antibodies that target a different part of the virus (spike vs nucleocapsid) in order to generate results. You may only have one type of COVID-19 antibody present.

If you have any questions about your COVID-19 antibody/serology results, please contact the GENCOV study team at (416) 586-4800 ext. 5738 or email [GEN.COV@sinaihealth.ca](mailto:GEN.COV@sinaihealth.ca).

Thank you,

The GENCOV Study Team

**Co-investigators:** Drs. Jordan Lerner-Ellis, PhD, FACMG and Jennifer Taher, PhD, FCACB

**Tel:** 416-586-4800 x 5738

**Fax:** 416-586-8882, Attn: Dr. Jordan Lerner-Ellis

[GEN.COV@sinaihealth.ca](mailto:GEN.COV@sinaihealth.ca)

Mount Sinai Hospital

Department of Pathology and Laboratory Medicine

700 University Avenue, Toronto, ON M5G 1X5

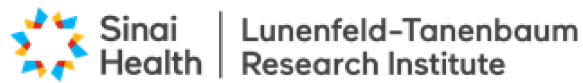

*A patient care, teaching and research centre affiliated with University of Toronto.*

Dear participant,

Thank you for participating in the GENCOV study: Implementation of serological and molecular tools to inform COVID-19 patient management being conducted by a research team at Mount Sinai Hospital in Toronto. Below is a summary of your [#] month COVID-19 (SARS-CoV-2) antibody results after the [first/second] dose of the [Pfizer/Moderna/AstraZeneca/Johnson & Johnson] vaccine:

Result: **POSITIVE FOR SPIKE SARS-CoV-2 ANTIBODIES**

Total antibody level: **Please refer to attached report**

Your blood was assessed for the presence of COVID-19 antibodies by two different tests. Each test measures COVID-19 antibodies that target a different part of the virus in order to generate results. One test measures antibodies that target the “nucleocapsid” protein and one test measures antibodies that target the “spike” protein of the COVID-19 virus. Your results indicate that you are positive for only spike antibodies, which is consistent with having had a COVID-19 vaccination.

If you have any questions about your COVID-19 antibody/serology results, please contact the GENCOV study team at (416) 586-4800 ext. 5738 or email [GEN.COV@sinaihealth.ca](mailto:GEN.COV@sinaihealth.ca).

Thank you,

The GENCOV Study Team

**Co-investigators:** Drs. Jordan Lerner-Ellis, PhD. FACMG and Jennifer Taher, PhD, FCACB

**Tel:** 416-586-4800 x 5738

**Fax:** 416-586-8882, Attn: Dr. Jordan Lerner-Ellis

[GEN.COV@sinaihealth.ca](mailto:GEN.COV@sinaihealth.ca)

Mount Sinai Hospital

Department of Pathology and Laboratory Medicine

700 University Avenue, Toronto, ON M5G 1X5

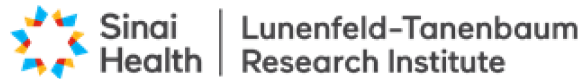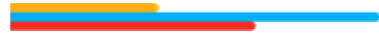

*A patient care, teaching and research centre affiliated with University of Toronto.*

Dear participant,

Thank you for participating in the GENCOV study: Implementation of serological and molecular tools to inform COVID-19 patient management being conducted by a research team at Mount Sinai Hospital in Toronto. Below is a summary of your [#] month COVID-19 (SARS-CoV-2) antibody results after the [first/second] dose of the [Pfizer/Moderna/AstraZeneca/Johnson & Johnson] vaccine:

Result: **NEGATIVE (COVID-19 antibodies NOT identified)**

Total antibody level: **Please refer to attached report**

A negative result means that we did not identify COVID-19 antibodies in your blood. You may have been tested too early or too late after your COVID-19 vaccination, and your antibodies did not show up in sufficient levels on the test. This does not mean that your COVID-19 vaccination was not effective.

If you have any questions about your COVID-19 antibody/serology results, please contact the GENCOV study team at (416) 586-4800 ext. 5738 or email [GEN.COV@sinaihealth.ca](mailto:GEN.COV@sinaihealth.ca).

Thank you,

The GENCOV Study Team

**Co-investigators:** Drs. Jordan Lerner-Ellis, PhD, FACMG and Jennifer Taher, PhD, FCACB

**Tel:** 416-586-4800 x 5738

**Fax:** 416-586-8882, Attn: Dr. Jordan Lerner-Ellis

[GEN.COV@sinaihealth.ca](mailto:GEN.COV@sinaihealth.ca)

Mount Sinai Hospital

Department of Pathology and Laboratory Medicine

700 University Avenue, Toronto, ON M5G 1X5

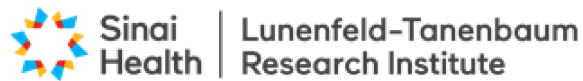

*A patient care, teaching and research centre affiliated with University of Toronto.*

Dear participant,

Thank you for participating in the GENCOV study: Implementation of serological and molecular tools to inform COVID-19 patient management being conducted by a research team at Mount Sinai Hospital in Toronto. Below is a summary of your [#] month COVID-19 (SARS-CoV-2) antibody results after the [first/second] dose of the [Pfizer/Moderna/AstraZeneca/Johnson & Johnson] vaccine:

**Result: POSITIVE FOR SPIKE AND NUCLEOCAPSID SARS-CoV-2 ANTIBODIES**

Total antibody level: **Please refer to attached report**

Your blood was assessed for the presence of COVID-19 antibodies by two different tests. Each test measures COVID-19 antibodies that target a different part of the virus in order to generate results. One test measures antibodies that target the “nucleocapsid” protein and one test measures antibodies that target the “spike” protein of the COVID-19 virus. Your results indicate that you are positive for spike antibodies, which are present after COVID-19 vaccination or infection. Your results also show that you are positive for nucleocapsid antibodies, which suggests that you may have had recent or past exposure to COVID-19.

If you have any questions about your COVID-19 antibody/serology results, please contact the GENCOV study team at (416) 586-4800 ext. 5738 or email [GEN.COV@sinaihealth.ca](mailto:GEN.COV@sinaihealth.ca).

Thank you,

The GENCOV Study Team

**Co-investigators:** Drs. Jordan Lerner-Ellis, PhD, FACMG and Jennifer Taher, PhD, FCACB

**Tel:** 416-586-4800 x 5738

**Fax:** 416-586-8882, Attn: Dr. Jordan Lerner-Ellis

[GEN.COV@sinaihealth.ca](mailto:GEN.COV@sinaihealth.ca)

Mount Sinai Hospital

Department of Pathology and Laboratory Medicine

700 University Avenue, Toronto, ON M5G 1X5

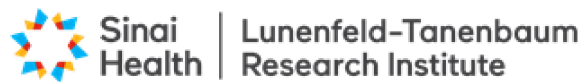

*A patient care, teaching and research centre affiliated with University of Toronto.*

Dear participant,

Thank you for participating in the GENCOV study: Implementation of serological and molecular tools to inform COVID-19 patient management being conducted by a research team at Mount Sinai Hospital in Toronto. Below is a summary of your [#] month COVID-19 (SARS-CoV-2) antibody results after the [first/second] dose of the [Pfizer/Moderna/AstraZeneca/Johnson & Johnson] vaccine:

**Result: POSITIVE FOR NUCLEOCAPSID ANTIBODIES**

Total antibody level: **Please refer to attached report**

Your blood was assessed for the presence of COVID-19 antibodies by two different tests. Each test measures COVID-19 antibodies that target a different part of the virus in order to generate results. One test measures antibodies that target the “nucleocapsid” protein and one test measures antibodies that target the “spike” protein of the COVID-19 virus. Your results indicate that you are positive for nucleocapsid antibodies, which suggests that you may have had a recent or past exposure to COVID-19. Your results also show that you are negative for spike antibodies, which are usually present after a COVID-19 vaccination or infection. This does not mean that your COVID-19 vaccination was not effective. You may have been tested too early or too late after your COVID-19 vaccination, and your spike antibodies did not show up in sufficient levels on the test.

If you have any questions about your COVID-19 antibody/serology results, please contact the GENCOV study team at (416) 586-4800 ext. 5738 or email [GEN.COV@sinaihealth.ca](mailto:GEN.COV@sinaihealth.ca).

Thank you,

The GENCOV Study Team

**Co-investigators:** Drs. Jordan Lerner-Ellis, PhD, FACMG and Jennifer Taher, PhD, FCACB

**Tel:** 416-586-4800 x 5738

**Fax:** 416-586-8882, Attn: Dr. Jordan Lerner-Ellis

[GEN.COV@sinaihealth.ca](mailto:GEN.COV@sinaihealth.ca)

Mount Sinai Hospital

Department of Pathology and Laboratory Medicine

700 University Avenue, Toronto, ON M5G 1X5

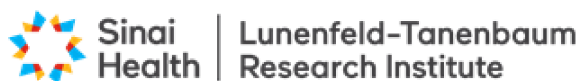

*A patient care, teaching and research centre affiliated with University of Toronto.*
