# Supplementary material for: Implementation of serological and molecular tools to inform COVID-19 patient management: protocol for the GENCOV prospective cohort study
Source: HighWire-hosted journal article supplement (doi:10.1136/bmjopen-2021-052842), 2021-09-01
Supplement: bmjopen-2021-052842supp002_data_supplement.pdf [file bmjopen-2021-052842supp002_data_supplement.pdf]

Confidential

LERNER-ELLIS - Implementation of serological and molecular tools for COVID-19 patient management 22-Mar-2021

Page 1

## Participant Demographics And Information Gencov

Record ID

OHIP number

Email

Study Email

### Demographics

Clinical centre/hospital name

Outpatient or Inpatient? (Based on when consented for study)

 Outpatient Inpatient

(If outpatient, complete outpatient data collection form only. If inpatient or ED complete inpatient and ED data collection form only.)

Country

Enrolment date/first COVID-19 assessment date (swab date)

Ethnic group

 Arab Black East Asian South Asian West Asian Latin American, White Aboriginal/First Nations Other Unknown

(Check all that apply)

If other, please specify

Employed as a healthcare worker?

 No  Yes  Unknown

Employed in a microbiology lab?

 No  Yes  Unknown

Age

Confidential

Page 2

|                                           |                                                                                                                                                              |
|-------------------------------------------|--------------------------------------------------------------------------------------------------------------------------------------------------------------|
| Sex Assigned at Birth                     | <input type="radio"/> Male <input type="radio"/> Female <input type="radio"/> Intersex<br><input type="radio"/> Not specified/Unknown                        |
| Pregnant                                  | <input type="radio"/> No <input type="radio"/> Yes <input type="radio"/> Unknown                                                                             |
| Gestational weeks assessment              | _____                                                                                                                                                        |
| Postpartum?                               | <input type="radio"/> No <input type="radio"/> Yes <input type="radio"/> Unknown<br>(If no, skip this section)                                               |
| Pregnancy outcome                         | <input type="radio"/> Live birth <input type="radio"/> Still birth<br><input type="radio"/> Unknown                                                          |
| Delivery date                             | _____                                                                                                                                                        |
| Baby tested for COVID-19?                 | <input type="radio"/> No <input type="radio"/> Yes <input type="radio"/> Unknown                                                                             |
| If yes, what was the test result?         | <input type="radio"/> Positive <input type="radio"/> Negative<br><input type="radio"/> Unknown                                                               |
| Infant < 1 year old?                      | <input type="radio"/> No <input type="radio"/> Yes <input type="radio"/> Unknown<br>(If no, skip this section)                                               |
| Birth weight (kg)                         | _____                                                                                                                                                        |
| Gestational outcome                       | <input type="radio"/> Term birth (greater than or equal to 37 weeks) <input type="radio"/> Pre-term birth (less than 37 weeks) <input type="radio"/> Unknown |
| Breastfed?                                | _____                                                                                                                                                        |
| Vaccinations appropriate for age/country? | <input type="radio"/> No <input type="radio"/> Yes <input type="radio"/> Unknown                                                                             |

**Study Progress Check Points (To be Filled by Sinai Team)**

|                                    |                                                                                                                          |
|------------------------------------|--------------------------------------------------------------------------------------------------------------------------|
| 1 month blood requisition sent?    | <input type="radio"/> No<br><input type="radio"/> Yes                                                                    |
| Pre-test counselling scheduled?    | <input type="radio"/> No<br><input type="radio"/> Yes<br>( 'Yes' will trigger intake questionnaire + baseline measures ) |
| Pre-testing counselling completed? | <input type="radio"/> No<br><input type="radio"/> Yes<br>( 'Yes' will trigger T1 measures to be sent via email )         |

*Confidential*

Page 3

---

Results delivered to participant?

No

Yes

('Yes' will trigger T2 outcome measures link to be sent via email / Followed by T3 outcome measures after 6 months)

Confidential

LERNER-ELLIS - Implementation of serological and molecular tools for COVID-19 patient management 22-Mar-2021

Page 1

## Comorbidities And Risk Factors Gencov

Record ID

Chronic cardiac disease (not hypertension)  No  Yes  Unknown

Balloon angioplasty or percutaneous coronary intervention  No  Yes,  Unknown

Coronary artery bypass  No  Yes  Unknown

Myocardial infarction Type I  No  Yes  Unknown

Myocardial infarction Type II  No  Yes  Unknown

Hypertension  No  Yes  Unknown

Coronary artery disease  No  Yes  Unknown

Congestive heart failure  No  Yes  Unknown

Chronic obstructive pulmonary disease (not asthma)  No  Yes  Unknown

Asthma  No  Yes  Unknown

Chronic lung disease  No  Yes  Unknown

Cystic Fibrosis  No  Yes  Unknown

Sleep Apnea  No  Yes  Unknown

Home CPAP (continuous positive airway pressure) device used at night  No  Yes  Unknown

Gallbladder disease  No  Yes  Unknown

Obesity (as defined by clinical staff)  No  Yes  Unknown

Diabetes Mellitus  Type 1  Type 2  MODY  
 Gestational  No  Unknown  
 Unknown Type

Chronic metabolic disease  No  Yes  Unknown

Chronic neurological disease  No  Yes  Unknown

Dementia  No  Yes  Unknown

Cerebrovascular disease  No  Yes  Unknown

Confidential

Page 2

|                                   |                                                                                                                               |
|-----------------------------------|-------------------------------------------------------------------------------------------------------------------------------|
| Peripheral vascular disease       | <input type="radio"/> No <input type="radio"/> Yes <input type="radio"/> Unknown                                              |
| Stroke                            | <input type="radio"/> No <input type="radio"/> Yes <input type="radio"/> Unknown                                              |
| Arrhythmias                       | <input type="radio"/> No <input type="radio"/> Yes, <input type="radio"/> Unknown                                             |
| Down syndrome                     | <input type="radio"/> No <input type="radio"/> Yes <input type="radio"/> Unknown                                              |
| Chronic kidney disease            | <input type="radio"/> No <input type="radio"/> Yes <input type="radio"/> Unknown                                              |
| Solid organ transplant            | <input type="radio"/> No <input type="radio"/> Yes <input type="radio"/> Unknown                                              |
| Bone marrow transplant            | <input type="radio"/> No <input type="radio"/> Yes <input type="radio"/> Unknown                                              |
| Chronic immunosuppressive disease | <input type="radio"/> No <input type="radio"/> Yes <input type="radio"/> Unknown                                              |
| Autoimmune/Rheumatologic disease  | <input type="radio"/> No <input type="radio"/> Yes <input type="radio"/> Unknown                                              |
| Chronic hematologic/blood disease | <input type="radio"/> No <input type="radio"/> Yes <input type="radio"/> Unknown                                              |
| Sickle cell disease               | <input type="radio"/> No <input type="radio"/> Yes <input type="radio"/> Unknown                                              |
| Thalassemia                       | <input type="radio"/> No <input type="radio"/> Yes <input type="radio"/> Unknown                                              |
| Gastrointestinal disease          | <input type="radio"/> No <input type="radio"/> Yes <input type="radio"/> Unknown                                              |
| Liver disease                     | <input type="radio"/> Mild <input type="radio"/> Moderate or severe<br><input type="radio"/> No <input type="radio"/> Unknown |
| Asplenia                          | <input type="radio"/> No <input type="radio"/> Yes <input type="radio"/> Unknown                                              |
| Pancreatic disease                | <input type="radio"/> No <input type="radio"/> Yes <input type="radio"/> Unknown                                              |
| Cancer/malignant neoplasm         | <input type="radio"/> No <input type="radio"/> Yes <input type="radio"/> Unknown                                              |
| Patient age at diagnosis          | _____                                                                                                                         |
| Leukemia                          | <input type="radio"/> No <input type="radio"/> Yes, <input type="radio"/> Unknown                                             |
| Lymphoma                          | <input type="radio"/> No <input type="radio"/> Yes <input type="radio"/> Unknown                                              |
| Sarcoma                           | <input type="radio"/> No <input type="radio"/> Yes, <input type="radio"/> Unknown                                             |
| Carcinoma                         | <input type="radio"/> No <input type="radio"/> Yes <input type="radio"/> Unknown                                              |
| Myeloma                           | <input type="radio"/> No <input type="radio"/> Yes <input type="radio"/> Unknown                                              |
| Mixed Types                       | <input type="radio"/> No <input type="radio"/> Yes <input type="radio"/> Unknown                                              |
| Other Cancer Type                 | _____                                                                                                                         |

Confidential

Page 3

Cancer Location

- Skin  
 Lungs  
 Breast  
 Head and neck  
 Digestive/Gastrointestinal  
 Gynecologic  
 Genitourinary (bladder, kidney, prostate, penile, testicular)  
 Eye  
 Musculoskeletal  
 Germ cell/CNS  
 Other  
 Don't know

Specify other cancer location

Cancer treatment in the past 12 months (please mark all that apply)

- Surgery  
 Chemotherapy  
 Radiation therapy  
 HSCT  
 Immunotherapy  
 Hormone therapy  
 Clinical trials  
 Other  
 Don't know

Specify other cancer treatment

AIDS/HIV

- Yes-on ART    Yes-not on ART  
 No    Unknown

Tuberculosis

- No    Yes    Unknown

Malnutrition

- No    Yes    Unknown

Smoking

- Yes    Never smoked  
 Former smoker    Unknown

Pregnant

- No    Yes    Unknown

Other relevant risk factor(s)

- No    Yes    Unknown

If yes, please specify

Confidential

LERNER-ELLIS - Implementation of serological and molecular tools for COVID-19 patient management 22-Mar-2021

Page 1

## Inpatient and ED Admission Outcome Pre-med Gencov

Record ID

\_\_\_\_\_

Inpatient or ED patient?

 Inpatient    Emergency department (ED)

CTAS score

\_\_\_\_\_

### Onset and Admission

Admitted to (Hospital Name)

\_\_\_\_\_

Date of hospital admission

\_\_\_\_\_

ED Visit Date

\_\_\_\_\_

Reason for visit

- Showing signs of COVID-19 symptoms
- Pre-travel (i.e. flights, visa)
- Exposure/close contact (e.g. COVID alert app, Local Public Health, sent by Occupational Health)
- Targeted testing (i.e. visitors/workers/residents of LTC/homeless shelter, Indigenous communities, farm worker, etc.)
- Live or work in setting with COVID-19 Outbreak
- Pre-treatment or pre-surgery
- Other (specify)

If other, specify

\_\_\_\_\_

Multiple Visits to ED

 Yes    No

ED Visit Date

\_\_\_\_\_

Reason for visit

- Showing signs of COVID-19 symptoms
- Pre-travel (i.e. flights, visa)
- Exposure/close contact (e.g. COVID alert app, Local Public Health, sent by Occupational Health)
- Targeted testing (i.e. visitors/workers/residents of LTC/homeless shelter, Indigenous communities, farm worker, etc.)
- Live or work in setting with COVID-19 Outbreak
- Pre-treatment or pre-surgery
- Other (specify)

If other, specify

\_\_\_\_\_

Confidential

Page 2

ED Visit Date  
\_\_\_\_\_

Reason for visit

- Showing signs of COVID-19 symptoms  
 Pre-travel (i.e. flights, visa)  
 Exposure/close contact (e.g. COVID alert app, Local Public Health, sent by Occupational Health)  
 Targeted testing (i.e. visitors/workers/residents of LTC/homeless shelter, Indigenous communities, farm worker, etc.)  
 Live or work in setting with COVID-19 Outbreak  
 Pre-treatment or pre-surgery  
 Other (specify)

If other, specify  
\_\_\_\_\_

ICU or high dependency unit admission?

- No    Yes    Unknown

If yes, admission date  
\_\_\_\_\_If yes, date of discharge  
\_\_\_\_\_If yes, total duration (days)  
\_\_\_\_\_

Current admission to ICU/ITU/IMC/HDU?

- No    Yes    Unknown  
 (Record the worst value on day of assessment for following questions)

Richmond Agitation-Sedation Scale (RASS)  
\_\_\_\_\_Riker Sedation-Agitation Scale (SAS)  
\_\_\_\_\_Onset date of first/earliest symptom  
\_\_\_\_\_

Was the patient Asymptomatic?

- Yes  
 No

Was the patient admitted previously or transferred from any other facility during this illness episode?

- Yes- admitted previously to this facility  
 Yes-transferred from other facility  
 No    Unknown

Name of transfer facility  
\_\_\_\_\_ER triage date at transfer facility  
\_\_\_\_\_



Confidential

Page 3

Has this patient's data previously been collected under a different patient number?  No  Yes  Unknown

If yes, participant identification number (PIN)

Source study ID# from transfer facility

HostSeq study ID # from transfer facility

### Signs and Symptoms (no multiple measure)

Height (inches)

Ambulatory state

No limitation of activities  
 Limitation of activities

### Pre-admission/Already On Medication

ACE inhibitors  No  Yes  Unknown

If yes, list names

ARBs  No  Yes  Unknown

If yes, list names

Oral steroids  No  Yes  Unknown

If yes, list names

NSAIDs  No  Yes  Unknown

If yes, list names

Other immunosuppressant agents (not oral steroids)  Rituximab  MMF  
 Other  No  Unknown

If other, list names

Confidential

Page 4

Antivirals  Remdesivir  Hydroxychloroquine (HCQ)  Kaletra  Ivermectin  Other  No  Unknown

If other, list names

\_\_\_\_\_

Antibiotics  No  Yes  Unknown

If yes, list names

\_\_\_\_\_

Other targeted COVID-19 medications  No  Yes  Unknown

If yes, list names

\_\_\_\_\_

Statins  Yes  No  Unknown

If yes, list names

\_\_\_\_\_

Novel Oral Anticoagulants (NOACs)  Yes  No  Unknown

If yes, list names

\_\_\_\_\_

Warfarin  Yes  No  Unknown

Other Non-COVID related medications

\_\_\_\_\_

(List any other medications)

Has the patient received BCG vaccine?  No  Yes  Don't know

### Patient Outcome

Outcome  Discharged alive  Hospitalized  Transfer to other facility  Death  Palliative discharge  Unknown

Outcome date

\_\_\_\_\_

Transfer facility name

\_\_\_\_\_

Confidential

Page 5

---

If discharged alive, ability to self-care at discharge versus before illness:

- Same as before illness  
 Worse  Better  Unknown

---

If discharged alive, post-discharge treatment (oxygen therapy):

- No  Yes  Unknown

---

Outcome

- Discharged alive  Hospitalized  
 Transfer to other facility  
 Death  Palliative discharge  
 Unknown

---

Outcome date

---

---

Transfer facility name

---

---

If discharged alive, ability to self-care at discharge versus before illness:

- Same as before illness  
 Worse  Better  Unknown

---

If discharged alive, post-discharge treatment (oxygen therapy):

- No  Yes  Unknown

---

Outcome

- Discharged alive  Hospitalized  
 Transfer to other facility  
 Death  Palliative discharge  
 Unknown

---

Outcome date

---

---

Transfer facility name

---

---

If discharged alive, ability to self-care at discharge versus before illness:

- Same as before illness  
 Worse  Better  Unknown

---

If discharged alive, post-discharge treatment (oxygen therapy):

- No  Yes  Unknown

---

Repeat hospital visit within 30 days?

- No  Yes  Don't know

---

Date of repeat hospital visit

---

---

Reason for repeat hospital visit

---

Confidential

LERNER-ELLIS - Implementation of serological and molecular tools for COVID-19 patient management 22-Mar-2021

Page 1

# Inpatient and ED Symptom Complication Treatment Diagnostics Repeat Form Gencov

Record ID \_\_\_\_\_

Date of Assessment \_\_\_\_\_

(For ED patient or multiple ED visits)

7 Day Date Range for Inpatient (M-D-Y to M-D-Y) \_\_\_\_\_

Select based on patient status

 Inpatient Data  ED Visit Data

## Signs and Symptoms

Fever (degrees C) \_\_\_\_\_

Fever

 No  Yes  Unknown  
(38.0 degrees and above= qualifies as fever as per ISARIC)

Days with Fever

 Known  
 Unknown

Number of days fever lasted \_\_\_\_\_

Cough

 No  Yes-non-productive  
 Yes-productive  Yes-with haemoptysis  
 Unknown

Days with cough \_\_\_\_\_

Sore Throat

 No  Yes  Unknown

Runny nose

 No  Yes  Unknown

Wheezing

 No  Yes  Unknown

Shortness of breath/Difficulty Breathing

 No  Yes  Unknown

Increase Respiratory Effort (e.g. accessory muscle use, chest wall indrawing, tripodding)

 No  Yes  Unknown

Chest pain

 No  Yes  Unknown

Conjunctivitis

 No  Yes  Unknown

Confidential

Page 2

|                                 |                           |                           |                                  |
|---------------------------------|---------------------------|---------------------------|----------------------------------|
| Lymphadenopathy                 | <input type="radio"/> No  | <input type="radio"/> Yes | <input type="radio"/> Unknown    |
| Headache                        | <input type="radio"/> No  | <input type="radio"/> Yes | <input type="radio"/> Unknown    |
| Loss of smell                   | <input type="radio"/> No  | <input type="radio"/> Yes | <input type="radio"/> Unknown    |
| Loss of taste                   | <input type="radio"/> No  | <input type="radio"/> Yes | <input type="radio"/> Unknown    |
| Nosebleed                       | <input type="radio"/> No  | <input type="radio"/> Yes | <input type="radio"/> Don't know |
| Ear pain                        | <input type="radio"/> No  | <input type="radio"/> Yes | <input type="radio"/> Don't know |
| Seizures                        | <input type="radio"/> No  | <input type="radio"/> Yes | <input type="radio"/> Unknown    |
| Fatigue/malaise                 | <input type="radio"/> No  | <input type="radio"/> Yes | <input type="radio"/> Unknown    |
| Anorexia                        | <input type="radio"/> No  | <input type="radio"/> Yes | <input type="radio"/> Unknown    |
| Altered consciousness/confusion | <input type="radio"/> No  | <input type="radio"/> Yes | <input type="radio"/> Unknown    |
| Myalgia/muscle aches            | <input type="radio"/> No  | <input type="radio"/> Yes | <input type="radio"/> Unknown    |
| Arthralgia/joint pain           | <input type="radio"/> No  | <input type="radio"/> Yes | <input type="radio"/> Unknown    |
| Inability to walk               | <input type="radio"/> No  | <input type="radio"/> Yes | <input type="radio"/> Unknown    |
| Abdominal pain                  | <input type="radio"/> No  | <input type="radio"/> Yes | <input type="radio"/> Unknown    |
| Diarrhea                        | <input type="radio"/> No  | <input type="radio"/> Yes | <input type="radio"/> Unknown    |
| Nausea/vomiting                 | <input type="radio"/> No  | <input type="radio"/> Yes | <input type="radio"/> Unknown    |
| Skin rash                       | <input type="radio"/> No  | <input type="radio"/> Yes | <input type="radio"/> Unknown    |
| Bleeding/haemorrhage            | <input type="radio"/> No  | <input type="radio"/> Yes | <input type="radio"/> Unknown    |
| If yes, please specify site(s)  | _____                     |                           |                                  |
| Other symptom(s)                | <input type="radio"/> No  | <input type="radio"/> Yes | <input type="radio"/> Unknown    |
| If yes, please specify          | _____                     |                           |                                  |
| Any Allergies                   | <input type="radio"/> Yes | <input type="radio"/> No  | <input type="radio"/> Unknown    |
| If yes, please specify          | _____                     |                           |                                  |

Confidential

Page 3

On Oxygen Type  Room Air  Oxygen Therapy  
 Unknown

Any supplemental oxygen: FiO<sub>2</sub> (0.21-1.0)  No  Yes  Unknown

Sternal capillary refill time >2s  No  Yes  Unknown

APVU  Alert  Verbal  Pain  
 Unresponsive

### Treatments and Interventions

High-flow nasal cannula oxygen therapy  No  Yes  Unknown

Non-invasive ventilation  No  Yes  Unknown

If yes, select:  HFNC  BIPAP  Other

If other, specify:

\_\_\_\_\_

If yes, total duration (days)

\_\_\_\_\_

Invasive ventilation  No  Yes  Unknown

If yes, total duration (days)

\_\_\_\_\_

Prone positioning  No  Yes  Unknown

If yes, total duration (days)

\_\_\_\_\_

Inhaled nitric oxide  No  Yes  Unknown

Tracheostomy inserted  No  Yes  Unknown

Extra corporeal life support (ECLS/ECMO)  No  Yes  Unknown

If yes:  VV  AV  Central  
 Unknown

If yes, total duration (days)

\_\_\_\_\_

Renal replacement therapy (RRT) or dialysis  No  Yes  Unknown

Any vasopressor/inotropic support?  No  Yes  Unknown  
 (If no, select 'no' for the next 3 questions)

Inotropes/vasopressors start date

\_\_\_\_\_

Confidential

Page 4

---

 Inotropes/vasopressors end date
 

---



---

 If yes, total duration (days)
 

---



---

 Dopamine < 5ug/kg/min OR Dobutamine OR milrinone OR levosimendan
  No
  Yes
  Unknown
 

---



---

 Dopamine 5-15ug/kg/min OR Epinephrine/Norepinephrine < 0.1ug/kg/min OR vasopressin OR phenylephrine
  No
  Yes
  Unknown
 

---



---

 Dopamine >15ug/kg/min OR Epinephrine/Norepinephrine > 0.1ug/kg/min
  No
  Yes
  Unknown
 

---



---

 Neuromuscular blocking agents
  No
  Yes
  Unknown
 

---



---

 Other interventions or procedures?
  No
  Yes
  Unknown
 

---



---

 If yes, specify
 

---



---

 Any oxygen therapy?
  No
  Yes
  Unknown
 

---



---

 If yes, total duration (days)
 

---



---

 If yes, max O2 flow volume
  < 2 L/min
  2-5 L/min
  6-10 L/min
  11-15 L/min
  >15 L/min
 

---



---

 Convalescent blood transfusion
  No
  Yes
  Unknown
 

---



---

 If yes, adverse reaction?
  No
  Yes
  Unknown
 

---



---

 If yes, type of adverse reaction
  Acute lung injury
  Allergic reaction
  Circulatory overload
  Other
 

---



---

 If other adverse reaction, specify
 

---

### Complications

---

 Viral pneumonia/pneumonitis
  No
  Yes
  Unknown
 

---



---

 Bacterial pneumonia
  No
  Yes
  Unknown
 

---



---

 Confirmed
  Clinically
  By Imaging
  Other
 

---

Confidential

Page 5

---

 If Other, please specify \_\_\_\_\_
 

---



---

 Acute Respiratory Distress Syndrome  No  Yes  Unknown
 

---



---

 If yes, specify  Mild  Moderate  Severe  
 Unknown
 

---



---

 Pneumothorax  No  Yes  Unknown
 

---



---

 Pleural effusion  No  Yes  Unknown
 

---



---

 Cryptogenic organizing pneumonia  No  Yes  Unknown
 

---



---

 Bronchiolitis  No  Yes  Unknown
 

---



---

 Cardiac arrest  No  Yes  Unknown
 

---



---

 Myocardial infarction  No  Yes  Unknown
 

---



---

 Cardiac ischaemia  No  Yes  Unknown
 

---



---

 Specify type of cardiac ischaemia  STEMI  NSTEMI  
 Cath  Stent
 

---



---

 Cardiac arrhythmia  No  Yes  Unknown
 

---



---

 Specify type(s) of cardiac arrhythmia  AF  VT/VF  Other
 

---



---

 Specify other type(s) of cardiac arrhythmia \_\_\_\_\_
 

---



---

 Myocarditis/Pericarditis  No  Yes  Unknown
 

---



---

 Endocarditis  No  Yes  Unknown
 

---



---

 Cardiomyopathy  No  Yes  Unknown
 

---



---

 Type of Cardiomyopathy  Dilated Cardiomyopathy (DCM)  
 Hypertrophic Cardiomyopathy (HCM)  
 Restrictive Cardiomyopathy (RCM)  
 Left Ventricular Non-Compaction (LVNC)  
 Arrhythmogenic Right Ventricular Dysplasia (ARVD)
 

---



---

 Congestive heart failure  No  Yes  Unknown
 

---



---

 Specify left ventricular ejection fraction status  Normal  Decreased
 

---



---

 Specify % decrease \_\_\_\_\_
 

---



Confidential

Page 6

|                                             |                                                                                     |
|---------------------------------------------|-------------------------------------------------------------------------------------|
| Seizures                                    | <input type="radio"/> No <input type="radio"/> Yes <input type="radio"/> Unknown    |
| Stroke/Cerebrovascular accident             | <input type="radio"/> No <input type="radio"/> Yes <input type="radio"/> Unknown    |
| Meningitis/Encephalitis                     | <input type="radio"/> No <input type="radio"/> Yes <input type="radio"/> Unknown    |
| Bacteremia                                  | <input type="radio"/> No <input type="radio"/> Yes <input type="radio"/> Unknown    |
| Coagulation disorder/DIC                    | <input type="radio"/> No <input type="radio"/> Yes <input type="radio"/> Unknown    |
| Pulmonary embolism                          | <input type="radio"/> No <input type="radio"/> Yes <input type="radio"/> Unknown    |
| Anemia                                      | <input type="radio"/> No <input type="radio"/> Yes <input type="radio"/> Unknown    |
| Rhabdomyolysis                              | <input type="radio"/> No <input type="radio"/> Yes <input type="radio"/> Unknown    |
| Acute renal injury/failure                  | <input type="radio"/> No <input type="radio"/> Yes <input type="radio"/> Unknown    |
| Gastrointestinal haemorrhage                | <input type="radio"/> No <input type="radio"/> Yes <input type="radio"/> Unknown    |
| Pancreatitis                                | <input type="radio"/> No <input type="radio"/> Yes <input type="radio"/> Unknown    |
| Liver dysfunction                           | <input type="radio"/> No <input type="radio"/> Yes <input type="radio"/> Unknown    |
| Hyperglycemia                               | <input type="radio"/> No <input type="radio"/> Yes <input type="radio"/> Unknown    |
| Hypoglycemia                                | <input type="radio"/> No <input type="radio"/> Yes <input type="radio"/> Unknown    |
| Inflammatory syndrome/Kawasaki disease like | <input type="radio"/> No <input type="radio"/> Yes <input type="radio"/> Don't know |
| Other complications                         | <input type="radio"/> No <input type="radio"/> Yes <input type="radio"/> Unknown    |
| If yes, specify                             | _____                                                                               |

**Diagnostics**

|                                                        |                                                                                                                                               |
|--------------------------------------------------------|-----------------------------------------------------------------------------------------------------------------------------------------------|
| Was pathogen testing done during this illness episode? | <input type="radio"/> No <input type="radio"/> Yes <input type="radio"/> Unknown<br>(If 'yes' complete the rest of this section )             |
| Coronavirus                                            | <input type="radio"/> Positive <input type="radio"/> Negative<br><input type="radio"/> Not done                                               |
| If positive for coronavirus:                           | <input type="radio"/> COVID-2019/SARS-CoV2<br><input type="radio"/> MERS CoV <input type="radio"/> Other CoV<br><input type="radio"/> Unknown |
| If other CoV, specify                                  | _____                                                                                                                                         |
| Collection date                                        | _____                                                                                                                                         |

Confidential

Page 7

Biospecimen type

- Nasal/NP swab    Throat swab  
 Combined nasal/NP+throat swab  
 Sputum    BAL    ETA  
 Urine    Feces/rectal swab  
 Blood    Other

If other, specify

Laboratory test method

- PCR    Culture    Other

If other, specify

Time to Viral Clearance (Days)

(Days between positive and negative swab)

Influenza

- Positive    Negative  
 Not done

If positive for influenza:

- A/H3N2    A/H1N1pdm09  
 A/H7N9    A/H5N1  
 A-not typed    B    Other  
 Unknown

If other, specify

Collection date

Biospecimen type

- Nasal/NP swab    Throat swab  
 Combined nasal/NP+throat swab  
 Sputum    BAL    ETA  
 Urine    Feces/rectal swab  
 Blood    Other

If other, specify

Laboratory test method

- PCR    Culture    Other

If other, specify

RSV

- Positive    Negative  
 Not done

Collection date

Confidential

Page 8

Biospecimen type

- Nasal/NP swab     Throat swab  
 Combined nasal/NP+throat swab  
 Sputum     BAL     ETA  
 Urine     Feces/rectal swab  
 Blood     Other

If other, specify

Laboratory test method

- PCR     Culture     Other

If other, specify

Adenovirus

- Positive     Negative  
 Not done

Collection date

Biospecimen type

- Nasal/NP swab     Throat swab  
 Combined nasal/NP+throat swab  
 Sputum     BAL     ETA  
 Urine     Feces/rectal swab  
 Blood     Other

If other, specify

Laboratory test method

- PCR     Culture     Other

If other, specify

Bacteria

- Positive     Negative  
 Not done

Specify Bacteria Type

- Streptococcus pneumoniae  
 Staphylococcus aureus  
 Group A streptococcus  
 Escherichia coli  
 Klebsiella pneumoniae  
 Other

Specify other bacteria type

Specify location(s)

- Blood  
 Lower respiratory tract  
 Urine  
 Bone or joint  
 CNS  
 Other

Specify other location(s)

Confidential

Page 9

---

Collection date

---

---

Biospecimen type

- Nasal/NP swab    Throat swab  
 Combined nasal/NP+throat swab  
 Sputum    BAL    ETA  
 Urine    Feces/rectal swab  
 Blood    Other

---

If other, specify

---

---

Laboratory test method

- PCR    Culture    Other

---

If other, specify

---

---

Other pathogen(s) detected

- No    Yes    Unknown

---

If yes, specify

---

---

Other Pathogen Result

- Positive    Negative  
 Unknown

---

Collection date

---

---

Biospecimen type

- Nasal/NP swab    Throat swab  
 Combined nasal/NP+throat swab  
 Sputum    BAL    ETA  
 Urine    Feces/rectal swab  
 Blood    Other

---

If other, specify

---

---

Laboratory test method

- PCR    Culture    Other

---

If other, specify

---

---

Enterovirus

- Negative    Yes - Confirmed  
 Yes - Probable    Not tested

---

Collection date

---

Confidential

Page 10

|                                            |                                                                                                                                                                                                                                                                                                                                                    |
|--------------------------------------------|----------------------------------------------------------------------------------------------------------------------------------------------------------------------------------------------------------------------------------------------------------------------------------------------------------------------------------------------------|
| Biospecimen type                           | <input type="radio"/> Nasal/NP swab <input type="radio"/> Throat swab<br><input type="radio"/> Combined nasal/NP+throat swab<br><input type="radio"/> Sputum <input type="radio"/> BAL <input type="radio"/> ETA<br><input type="radio"/> Urine <input type="radio"/> Feces/rectal swab<br><input type="radio"/> Blood <input type="radio"/> Other |
| If other, specify                          | _____                                                                                                                                                                                                                                                                                                                                              |
| Laboratory test method                     | <input type="radio"/> PCR <input type="radio"/> Culture <input type="radio"/> Other                                                                                                                                                                                                                                                                |
| If other, specify                          | _____                                                                                                                                                                                                                                                                                                                                              |
| Clinical pneumonia diagnosed?              | <input type="radio"/> No <input type="radio"/> Yes <input type="radio"/> Unknown                                                                                                                                                                                                                                                                   |
| NONE OF THE ABOVE: Suspected Non-infective | <input type="radio"/> No <input type="radio"/> Yes <input type="radio"/> Don't know                                                                                                                                                                                                                                                                |
| Chest X-ray performed?                     | <input type="radio"/> No <input type="radio"/> Yes <input type="radio"/> Unknown                                                                                                                                                                                                                                                                   |
| Ground Glass Opacities (GGOs) present?     | <input type="radio"/> Multifocal <input type="radio"/> Bilateral<br><input type="radio"/> Peripheral                                                                                                                                                                                                                                               |
| GGOs Lobe Location                         | _____                                                                                                                                                                                                                                                                                                                                              |
|                                            | (Write lobe location for GGOs)                                                                                                                                                                                                                                                                                                                     |
| If yes, infiltrates present?               | <input type="radio"/> No <input type="radio"/> Yes <input type="radio"/> Unknown                                                                                                                                                                                                                                                                   |
| CT performed?                              | <input type="radio"/> No <input type="radio"/> Yes <input type="radio"/> Unknown                                                                                                                                                                                                                                                                   |
| If yes, infiltrates present?               | <input type="radio"/> No <input type="radio"/> Yes <input type="radio"/> Unknown                                                                                                                                                                                                                                                                   |
| ECG                                        | <input type="radio"/> No <input type="radio"/> Yes <input type="radio"/> Don't know                                                                                                                                                                                                                                                                |
| POCUS                                      | <input type="radio"/> No <input type="radio"/> Yes <input type="radio"/> Don't know                                                                                                                                                                                                                                                                |
| Echocardiogram                             | <input type="radio"/> No <input type="radio"/> Yes <input type="radio"/> Don't know                                                                                                                                                                                                                                                                |

Confidential

LERNER-ELLIS - Implementation of serological and molecular tools for COVID-19 patient management 22-Mar-2021

Page 1

## Inpatient Ed Medications In Hospital Gencov

Record ID

Select based on patient status

 Inpatient Data  ED Visit Data

### Medication (ANY) while hospitalized or at discharge

Antiviral or COVID-19 targeted agent?

 No  Yes  Unknown  
(If yes, specify agents and duration below)

Ribavirin

 No  Yes  Unknown

Date commenced

Duration (days)

Lopinavir/Ritonavir

 Yes  No  Unknown

Date commenced

Duration (days)

Remdesivir

 No  Yes  Unknown

Date commenced

Duration (days)

Plasma

 No  Yes  Don't know

Date commenced

Duration (days)

Interferon alpha

 No  Yes  Unknown

Date commenced

Duration (days)

Confidential

Page 2

---

Interferon beta  No  Yes  Unknown

---

Date commenced \_\_\_\_\_

---

Duration (days) \_\_\_\_\_

---

Chloroquine/hydroxychloroquine  No  Yes  Unknown

---

Date commenced \_\_\_\_\_

---

Duration (days) \_\_\_\_\_

---

Neuraminidase inhibitor  No  Yes  Don't know

---

Date commenced \_\_\_\_\_

---

Duration (days) \_\_\_\_\_

---

If yes, specify names, date of commencement, and duration

---

(Non-COVID)

---

Antibiotic?  No  Yes  Unknown

---

Other drug/medication  No  Yes  Unknown  
(Non-COVID )

---

Is yes, specify agent(s), date of commencement, and duration (days)

---

If yes, route:  Oral  IV  Inhaled  
 Unknown

---

If oral or IV, please provide agent and max. daily dose & unit

---

Corticosteroids?  No  Yes  Unknown

---

Date commenced \_\_\_\_\_

---

Duration (days) \_\_\_\_\_

Confidential

Page 3

---

Heparin  No  Yes  Unknown

---

If yes, route:  Subcutaneous  IV  
 Unknown

---

If yes:  Unfractionated  Low molecular weight  
 Fondaparinux  Unknown

---

Heparin Dose Unit \_\_\_\_\_

---

Date commenced \_\_\_\_\_

---

Heparin Dose Type  Full Dose  Intermediate Dose

---

Duration (days) \_\_\_\_\_

---

Antifungal agent  No  Yes  Unknown

---

Date commenced \_\_\_\_\_

---

Duration (days) \_\_\_\_\_

---

Colchicine  No  Yes  Don't know

---

Date commenced \_\_\_\_\_

---

Duration (days) \_\_\_\_\_

---

Tocilizumab (Actemra)  No  Yes  Don't know

---

Date commenced \_\_\_\_\_

---

Duration (days) \_\_\_\_\_

---

Kineret (Anakinra)  No  Yes  Don't know

---

Date commenced \_\_\_\_\_

---

Duration (days) \_\_\_\_\_

---

Intravenous Immune Globulin (IVIG)  No  Yes  Don't know



*Confidential*

Page 4

---

Date commenced

---

---

Duration (days)

---

---

Other treatments administered for COVID-19 including experimental and compassionate use?

No  Yes  Unknown

---

If yes, specify agent, date commenced, and duration (days)

---

Confidential

LERNER-ELLIS - Implementation of serological and molecular tools for COVID-19 patient management 22-Mar-2021

Page 1

# Outpatient Data Collection Form Gencov

Record ID

## Onset and Admission

Onset date of first/earliest symptom

Most recent presentation/symptom

Was the patient Asymptomatic?

- No  
 Yes

Reason for visit

- Showing signs of COVID-19 symptoms  
 Pre-travel (i.e. flights, visa)  
 Exposure/close contact (e.g. COVID alert app, Local Public Health, sent by Occupational Health)  
 Targeted testing (i.e. visitors/workers/residents of LTC/homeless shelter, Indigenous communities, farm worker, etc.)  
 Live or work in setting with COVID-19 Outbreak  
 Pre-treatment or pre-surgery  
 Other (specify)

If other, specify reason for visit

## Signs and Symptoms

Allergies

- No  Yes  Unknown

If yes, specify

Heart rate

Systolic blood pressure (mmHg)

Diastolic blood pressure (mmHg)

Respiratory rate

Oxygen saturation (SaO<sub>2</sub>)

*Confidential*

Page 2

Height (inches)

---

Weight (lbs)

---

Fever

No    Yes    Unknown  
 (38.0 degrees and above= qualifies as fever as per ISARIC)

Temperature

---

Time to viral clearance (days)

---

Cough

No    Yes-non-productive  
 Yes-productive    Yes-with haemoptysis  
 Unknown

Days with cough

---

Sore Throat

No    Yes    Unknown

Runny nose

No    Yes    Unknown

Wheezing

No    Yes    Unknown

Shortness of breath/Difficulty Breathing

No    Yes    Unknown

Lower chest wall indrawing

No    Yes    Unknown

Chest pain

No    Yes    Unknown

Conjunctivitis

No    Yes    Unknown

Lmyphadenopathy

No    Yes    Unknown

Headache

No    Yes    Unknown

Loss of smell

No    Yes    Unknown

Nosebleed

No    Yes    Don't know

Loss of taste

No    Yes    Unknown

Ear pain

No    Yes    Don't know

Seizures

No    Yes    Unknown

Confidential

Page 3

Fatigue/malaise  No  Yes  Unknown

Anorexia  No  Yes  Unknown

Altered consciousness/confusion  No  Yes  Unknown

Myalgia/muscle aches  No  Yes  Unknown

Arthralgia/joint pain  No  Yes  Unknown

Inability to walk  No  Yes  Unknown

Abdominal pain  No  Yes  Unknown

Diarrhea  No  Yes  Unknown

Nausea/vomiting  No  Yes  Unknown

Skin rash  No  Yes  Unknown

Bleeding/haemorrhage  No  Yes  Unknown

If yes, please specify site(s)

\_\_\_\_\_

Other symptom(s)  No  Yes  Unknown

If yes, please specify

\_\_\_\_\_

### Medications

ACE inhibitors  No  Yes - Pre-admission/clinic visit  
 Yes - Prescribed in clinic/hospital  
 Unknown

If yes, which medication:  
 Benazepril (Lotensin)  
 Captopril (Capoten)  
 Enalapril (Vasotec)  
 Other

If other, specify

\_\_\_\_\_

Notes

\_\_\_\_\_

Has the patient received BCG vaccine?  No  
 Yes  
 Don't know

Confidential

Page 4

---

ARBs  No  Yes - Pre-admission/clinic visit  
 Yes - Prescribed in clinic/hospital  
 Unknown

---

If yes, which medication:  Candesartan (Atacand)  
 Eprosartan (Tevetan)  
 Irbesartan (Avapro)  
 Other

---

If other, specify \_\_\_\_\_

---

Notes \_\_\_\_\_

---

NSAIDs  No  Yes - Pre-admission/clinic visit  
 Yes - Prescribed in clinic/hospital  
 Unknown

---

If yes, which medication:  Aspirin (Bayer)  
 Ibuprofen (Advil, Motrin)  
 Naproxen (Aleve)  
 Other

---

If other, specify \_\_\_\_\_

---

Notes \_\_\_\_\_

---

Oral steroids  No  Yes - Pre-admission/clinic visit  
 Yes - Prescribed in clinic/hospital  
 Unknown

---

If yes, which medication:  Prednisolone  
 Betamethasone  
 Dexamethasone  
 Hydrocortisone  
 Other

---

If other, specify \_\_\_\_\_

---

Notes \_\_\_\_\_

---

Other immunosuppressant agents (not oral steroids)  No  Yes - Pre-admission/clinic visit  
 Yes - Prescribed in clinic/hospital  
 Unknown

---

If yes, which medication:  Mycophenolate mofetil (MMF)  
 Rituximab  
 Other

Confidential

Page 5

---

If other, specify

---

Notes

---

Antivirals

- No  Yes - Pre-admission/clinic visit  
 Yes - Prescribed in clinic/hospital  
 Unknown

If yes, which medication:

- Remdesivir  
 Hydroxychloroquine (HCQ)  
 Kalertra  
 Ivermectin  
 Other

---

If other, specify

---

Notes

---

Antibiotics

- No  Yes - Pre-admission/clinic visit  
 Yes - Prescribed in clinic/hospital  
 Unknown

If yes, which medication:

- Amoxicillin  
 Doxycycline  
 Cephalexin  
 Ciprofloxacin  
 Other

---

If other, specify

---

Notes

---

Other Novel Anticoagulants (NOACs)

- No  Yes - Pre-admission/clinic visit  
 Yes - Prescribed in clinic/hospital  
 Unknown

If yes, which medication:

- Rivaroxaban (e.g. Xarelto)  
 Dabigatran (e.g. Pradaxa)  
 Apixaban (e.g. Eliquis)  
 Edoxaban (e.g. Lixiana)  
 Other

---

If other, specify

---

Notes

---

Confidential

Page 6

---

Warfarin  No  Yes - Pre-admission/clinic visit  
 Yes - Prescribed in clinic/hospital  
 Unknown

---

Lipid-lowering therapies  No  Yes - Pre-admission/clinic visit  
 Yes - Prescribed in clinic/hospital  
 Unknown

---

If yes, which medication:  Statin (e.g. Lipitor, Lescol, Lipostat)  
 Ezetimibe  
 Bile acid sequestrants  
 Other

---

If other, specify \_\_\_\_\_

---

Notes \_\_\_\_\_

---

Other targeted COVID-19 medications (e.g. colchicine)  No  Yes - Pre-admission/clinic visit  
 Yes - Prescribed in clinic/hospital  
 Unknown

---

If yes, specify \_\_\_\_\_

---

Notes \_\_\_\_\_

---

Other Medications  No  Yes - Pre-admission/clinic visit  
 Yes - Prescribed in clinic/hospital  
 Unknown

---

If yes, specify \_\_\_\_\_

---

Notes \_\_\_\_\_

Confidential

LERNER-ELLIS - Implementation of serological and molecular tools for COVID-19 patient management 22-Mar-2021

Page 1

## Signs And Biochemical Data Repeat Form Gencov

Record ID

Date of Assessment

(For ED patient or multiple ED visits)

Select based on patient status

 Inpatient Data  ED Visit Data

### Vital Signs Clinical Data

Temperature (degrees C)

Temperature Reference Interval

(Type in the reference interval)

The temp is

- Normal  
 High  
 Critically High  
 Low  
 Critically Low  
(Select based on reference interval and result value)

Heart rate (beats/min)

Heart rate Reference Interval

(Type in the reference interval)

The Heart Rate is

- Normal  
 High  
 Critically High  
 Low  
 Critically Low  
(Select based on reference interval and result value)

Respiratory rate (breaths/min)

Respiratory Rate Reference Interval

(Type in the reference interval)



Confidential

Page 2

---

The Respiratory Rate is

Normal  
 High  
 Critically High  
 Low  
 Critically Low  
(Select based on reference interval and result value)

---

Systolic blood pressure (mmHg)

---

Systolic BP Reference Interval

---

(Type in the reference interval)

---

---

The Systolic blood pressure is

Normal  
 High  
 Critically High  
 Low  
 Critically Low  
(Select based on reference interval and result value)

---

Diastolic blood pressure (mmHg)

---

Diastolic BP Reference Interval

---

(Type in the reference interval)

---

---

The Diastolic blood pressure is

Normal  
 High  
 Critically High  
 Low  
 Critically Low  
(Select based on reference interval and result value)

---

Mean arterial blood pressure (mmHg)

---

Mean Arterial BP Reference Interval

---

(Type in the reference interval)

---

---

The Mean arterial blood pressure is

Normal  
 High  
 Critically High  
 Low  
 Critically Low  
(Select based on reference interval and result value)

---

Weight (lbs)

---

Glasgow Coma Score (GCS / 15)

---

Confidential

Page 3

GCS Reference Interval

---

(Type in the reference interval)

The Glasgow Coma Score is

- Normal  
 High  
 Critically High  
 Low  
 Critically Low  
(Select based on reference interval and result value)

Urine flow rate (mL/24 hours)

The Urine flow rate is

- Normal  
 High  
 Critically High  
 Low  
 Critically Low  
(Select based on reference interval and result value)

**Biochemical Study Data**

Haemoglobin (g/L)

- Yes  
 Not Done

Haemoglobin (g/L)

Haemoglobin Reference Interval

---

(Type in the reference interval)

The Hemoglobin is

- Normal  High  Critically High  
 Low  Critically Low  
(Select based on reference interval and result value)

WBC Count

- Yes  
 Not Done

WBC count ( $\times 10^9/L$ )

WBC Count Reference Interval

---

(Type in the reference interval)

The WBC count is

- Normal  High  Critically High  
 Low  Critically Low  
(Select based on reference interval and result value)

Lymphocyte count

- Yes  
 Not Done

Confidential

Page 4

---

Lymphocyte count (x10<sup>9</sup>/L)

---

Lymphocyte count Reference Interval

---

The Lymphocyte count is

- Normal  High  Critically High  
 Low  Critically Low  
(Select based on reference interval and result value)

---

Neutrophil count

- Yes  
 Not Done

---

Neutrophil count (x10<sup>9</sup>/L)

---

Neutrophil count Reference Interval

---

The Neutrophil count is

- Normal  High  Critically High  
 Low  Critically Low  
(Select based on reference interval and result value)

---

Hematocrit count

- Yes  
 Not Done

---

Haematocrit (%)

---

Haematocrit Reference Interval

---

The Hematocrit is

- Normal  High  Critically High  
 Low  Critically Low  
(Select based on reference interval and result value)

---

Platelets Count

- Yes  
 Not Done

---

Platelets (x10<sup>9</sup>/L)

---

Platelets Reference Interval

---

The Platelets count is

- Normal  High  Critically High  
 Low  Critically Low  
(Select based on reference interval and result value)

---

Oxygen saturation test

- Yes  
 Not Done

Confidential

Page 5

---

 Blood Gas: Oxygen saturation (%)
 

---



---

 O2 saturation Reference Interval
 

---



---

 The Oxygen Saturation is

- Normal    High    Critically High  
 Low    Critically Low  
 (Select based on reference interval and result value)
- 

---

 PaO2 test

- Yes  
 Not Done
- 

---

 PaO2 (at time nearest to the FiO2 recorded in inpatient form) (indicate kPa or mmHg)
 

---



---

 PaO2 sample type

- Arterial    Capillary  
 Unknown
- 

---

 PaO2 Reference Interval
 

---



---

 The PaO2 is

- Normal    High    Critically High  
 Low    Critically Low  
 (Select based on reference interval and result value)
- 

---

 PCO2 test

- Yes  
 Not Done
- 

---

 PCO2 (indicate kPa or mmHg)
 

---

(From same blood gas record as PaO2)

---



---

 PCO2 Reference Interval
 

---



---

 The PCO2 is

- Normal    High    Critically High  
 Low    Critically Low  
 (Select based on reference interval and result value)
- 

---

 pH test

- Yes  
 Not Done
- 

---

 pH
 

---

(From same blood gas record as PaO2)

---



---

 pH Reference Interval
 

---

Confidential

Page 6

---

The pH is  Normal  High  Critically High  
 Low  Critically Low  
(Select based on reference interval and result value)

---

HCO<sub>3</sub><sup>-</sup> TEST  Yes  
 Not Done

---

HCO<sub>3</sub><sup>-</sup> (mEq/L) \_\_\_\_\_  
(From same blood gas record as PaO<sub>2</sub>)

---

HCO<sub>3</sub><sup>-</sup> Reference Interval \_\_\_\_\_

---

The HCO<sub>3</sub><sup>-</sup> is  Normal  High  Critically High  
 Low  Critically Low  
(Select based on reference interval and result value)

---

Base excess (mmol/L) \_\_\_\_\_  
(From same blood gas record as PaO<sub>2</sub>)

---

Base Excess Reference Interval \_\_\_\_\_

---

The Base Excess is  Normal  High  Critically High  
 Low  Critically Low  
(Select based on reference interval and result value)

---

APTT Test  Yes  
 Not Done

---

Activated Partial Thromboplastin time/APTT (seconds) \_\_\_\_\_

---

APTT Reference Interval \_\_\_\_\_

---

The APTT is  Normal  High  Critically High  
 Low  Critically Low  
(Select based on reference interval and result value)

---

Activated Partial Thromboplastin time ratio/APTR \_\_\_\_\_

---

APTR Reference Interval \_\_\_\_\_

---

The APTR is  Normal  High  Critically High  
 Low  Critically Low  
(Select based on reference interval and result value)

Confidential

Page 7

---

Prothrombin Test

- Yes  
 Not Done

---

Prothrombin time/PT (seconds)

---

---

PT Reference Interval

---

---

The Prothrombin time/PT is

- Normal  High  Critically High  
 Low  Critically Low  
(Select based on reference interval and result value)

---

INR Test

- Yes  
 Not Done

---

INR

---

---

INR Reference Interval

---

---

The INR is

- Normal  High  Critically High  
 Low  Critically Low  
(Select based on reference interval and result value)

---

ALT/SGPT Test

- Yes  
 Not Done

---

ALT/SGPT (U/L)

---

---

ALT Reference Interval

---

---

The ALT is

- Normal  High  Critically High  
 Low  Critically Low  
(Select based on reference interval and result value)

---

Bilirubin Test

- Yes  
 Not Done

---

Total bilirubin (umol/L)

---

---

Bilirubin Reference Interval

---

---

The Bilirubin is

- Normal  High  Critically High  
 Low  Critically Low  
(Select based on reference interval and result value)

Confidential

Page 8

---

AST/SGOT Test

- Yes  
 Not Done

---

AST/SGOT (U/L)

---

---

AST Reference Interval

---

---

The AST (U/L) is

- Normal  High  Critically High  
 Low  Critically Low  
(Select based on reference interval and result value)

---

Procalcitonin Test

- Yes  
 Not Done

---

Procalcitonin (ng/L)

---

---

Procalcitonin Reference Interval

---

---

The Procalcitonin is

- Normal  High  Critically High  
 Low  Critically Low  
(Select based on reference interval and result value)

---

BNP Test

- Yes  
 Not Done

---

BNP (ng/L)

---

---

BNP Reference Interval

---

---

The BNP is

- Normal  High  Critically High  
 Low  Critically Low  
(Select based on reference interval and result value)

---

NT-proBNP Test

- Yes  
 Not Done

---

NT-proBNP (ng/L)

---

---

NT-proBNP Reference Interval

---

---

The NT-proBNP is

- Normal  High  Critically High  
 Low  Critically Low  
(Select based on reference interval and result value)

Confidential

Page 9

---

C-reactive protein Test

- Yes  
 Not Done

---

C-reactive protein (mg/L)

---

---

C-reactive Reference Interval

---

---

The C-reactive protein is

- Normal  High  Critically High  
 Low  Critically Low  
(Select based on reference interval and result value)

---

Ferritin Test

- Yes  
 Not Done

---

Ferritin (ug/L)

---

---

Ferritin Reference Interval

---

---

The Ferritin is

- Normal  High  Critically High  
 Low  Critically Low  
(Select based on reference interval and result value)

---

Cytokine Test

- Yes  
 Not Done

---

Cytokine IL-6 (pg/mL)

---

---

Cytokine Reference Interval

---

---

The Cytokine is

- Normal  High  Critically High  
 Low  Critically Low  
(Select based on reference interval and result value)

---

Glucose Test

- Yes  
 Not Done

---

Glucose (mmol/L)

---

---

Glucose Reference Interval

---

---

The Glucose is

- Normal  High  Critically High  
 Low  Critically Low  
(Select based on reference interval and result value)



Confidential

Page 10

---

Lactate Test

- Yes  
 Not Done

---

Lactate (mmol/L)

---

---

Lactate Reference Interval

---

---

The Lactate is

- Normal  High  Critically High  
 Low  Critically Low  
(Select based on reference interval and result value)

---

Sodium Test

- Yes  
 Not Done

---

Sodium (mmol/L)

---

---

Sodium Reference Interval

---

---

The Sodium is

- Normal  High  Critically High  
 Low  Critically Low  
(Select based on reference interval and result value)

---

Potassium Test

- Yes  
 Not Done

---

Potassium (mmol/L)

---

---

Potassium Reference Interval

---

---

The Potassium is

- Normal  High  Critically High  
 Low  Critically Low  
(Select based on reference interval and result value)

---

Albumin Test

- Yes  
 Not Done

---

Albumin

---

---

Albumin Reference Interval

---

---

The Albumin is

- Normal  High  Critically High  
 Low  Critically Low  
(Select based on reference interval and result value)

Confidential

Page 11

---

LDH Test  Yes  
 Not Done

---

LDH (U/L)

---

---

LDH Reference Interval

---

---

The LDH is  Normal  High  Critically High  
 Low  Critically Low  
(Select based on reference interval and result value)

---

Creatinine Test  Yes  
 Not Done

---

Creatinine (umol/L)

---

---

Creatinine Reference Interval

---

---

The Creatinine is  Normal  High  Critically High  
 Low  Critically Low  
(Select based on reference interval and result value)

---

Creatine Kinase Test  Yes  
 Not Done

---

Creatine kinase (U/L)

---

---

Creatine kinase Reference Interval

---

---

The Creatine Kinase is  Normal  High  Critically High  
 Low  Critically Low  
(Select based on reference interval and result value)

---

Urea Test  Yes  
 Not Done

---

Urea (BUN) (mmol/L)

---

---

Urea Reference Interval

---

---

The Urea is  Normal  High  Critically High  
 Low  Critically Low  
(Select based on reference interval and result value)

Confidential

Page 12

---

Troponin Test  Yes  
 Not Done

---

Cardiac troponin I (ng/L)

---

Cardiac Troponin Reference Interval

---

---

The Cardiac troponin is  Normal  High  Critically High  
 Low  Critically Low  
(Select based on reference interval and result value)

---

---

D-dimer Test  Yes  
 Not Done

---

D-dimer (ng/mL)

---

D-dimer Reference Interval

---

---

The D-dimer is  Normal  High  Critically High  
 Low  Critically Low  
(Select based on reference interval and result value)

---

---

Fibrinogen Test  Yes  
 Not Done

---

Fibrinogen (g/L)

---

Fibrinogen Reference Interval

---

---

The Fibrinogen is  Normal  High  Critically High  
 Low  Critically Low  
(Select based on reference interval and result value)

---

---

Triglycerides Test  Yes  
 Not Done

---

Triglycerides (mg/dL)

---

Triglycerides Reference Interval

---

---

The Triglycerides is  Normal  High  Critically High  
 Low  Critically Low  
(Select based on reference interval and result value)

---

*Confidential*

Page 13

CD4/CD8 Test

- Yes  
 Not Done

CD4 result (cells/mm)

---

CD8 result (cells/mm)

---

CD4/CD8 ratio result

---

CD4//CD8 Reference Interval

---

The CD4/CD8 ratio is

- Normal    High    Critically High  
 Low    Critically Low  
(Select based on reference interval and result value)
